# Supplementary material for: A Gene Expression Atlas of the Domestic Water Buffalo (Bubalus bubalis)
Source: Front Genet. 2019 Jul 24;10:668. doi: 10.3389/fgene.2019.00668 (PMC6689995; doi:10.3389/fgene.2019.00668)
Supplement: Supplementary file 4 [file Table_4.xlsx]

## Sheet: Sheet1
Supplementary Table 4. Coding potential of putative novel CDS, which were added to the 'second pass' Kallisto index.
This table is the output of the online tool CPAT v1.2.2 (http://lilab.research.bcm.edu/cpat/index.php, accessed 12th April 2016), which assesses the coding potential of putative CDS: reconstructed by the de novo assembly of those reads that did not map to the B.bubalis transcriptome (UMD_CASPUR_WB_2.0).
Data ID	Sequence Name	RNA size	ORF size	Ficket Score	Hexamer Score	Coding Probability	Coding Label	CDS
0	EIF1A	417	417	1.0299	0.176577	0.6874	yes	ATGCCCAAGAATAAAGGTAAAGGAGGCAGAAACAGACGCAGGGGTAAGAAGGAGAATGAATATGAAAAAAGAGACTTAGTCTTTAAAGAAGATGGACAAGAATATGCTCAGGTAACCAAAATGCTGGGAAATGCACGATTGGAAGCAATGTGTTTTGATGGTGTGACAAGGATATGTCATATCCGAGGAAGCTTGAGAAAAAAGGTTTGGATAAATACTTCGGATATTATATTGATTGGTCTTCGAGACTATCAGGACAACAAAGCTGATGTAATTTTAAAGTACAATGCCGATGAAGCTAGAAGTCTGAAGGCTTATGGAGAGCTTCCGGAATATGCCGAACTTAGTGAAACAGATACCTTTGATCCTGAAGATGATGATGAAATCCAGTTTAAGGAT…
1	ERGIC3	1221	1152	1.2793	0.54998	0.999993	yes	CAAGCTCCGGGCCGGAAGCGGGAGGCTGCCGGGGCGGGCCCTCTGGCTTCCCCTTTCCGGCTGGTCCCCATGGAGGCGCTGGGGAAGCTGAAGCAGTTCGATGCCTATCCCAAGACTCTGGAGGACTTCCGGGTCAAGACCTGCGGGGGCGCCACGGTGACCATTGTCAGTGGCCTTCTTATGCTACTATTGTTCCTGTCAGAGCTGCAGTATTACCTCACCACAGAGGTGCATCCTGAACTCTACGTGGACAAGTCACGGGGGGATAAACTGAAGATCAACATCAATGTGCTCTTTCCGCACATGCCTTGTGCTTATCTGAGCATCGATGCCATGGATGTGGCTGGGGAGCAGCAGCTGGATGTGGAGCACAACCTGTTCAAAAAACGGCTTGATAAG…
2	TSACC	420	420	0.8127	0.082046	0.380761	yes	ATGTGTATCAACAACAAGGGCACCACACCTGAGGGTGTTCAGATGGAGCAGCTTCCTAGTCATCCTACTAACAGAAGAGCCAAAGAGGAGGGTAATACTGTGCCTCTTTGTCGAGCCAAACCCTCCCCCAGCTTTATTAATCTTCAAGCAAGTTCCCCACCAGTCACTTTCCTGAAAATCCTGCCAACAAAGTTGCCGTCAGGTATTGACCACAAGCCCAAGGAATGCCTAGGACTCCTAGAATGTATGTATGCCAATCTCCAGCTTCAGACCCAGCTCGCCCAACAACAGATGGCTATTTTGGAAAATTTACAAGCATCCATGACACAACTGGCTCCTGGGAAAGAAAACAAGAACTCTTCTCTCCCAGCCTTATCTCGCAATCTATTGTTCAGTCAC…
3	TRBC1	561	207	1.2744	-0.159663	0.0500684	no	GGGGGCACTCGGCTGTTGGTGCTAGATGATCTGAGCCGGGTCTACCCGCCCAAGGTGGCTGTGTTCGAACCCTCGGAGGCAGAGATCTCCCGGACCCAGAAGGCCACACTCGTGTGCCTGGCCACGGGCTTCTACCCCGACCATGTGGAGCTGACCTGGTGGGTGAACAGGAAGCAGGTCACGACTGGGGTCAGCACGGACCCTGAGCCCTATAAGGAGGACCCCACACGGGATGATTCCAGATACTGTCTGAGCAGCCGGCTGAGGGTGACCGCCGCCTTCTGGCACAACCCCCGCAACCACTTCCGATGCCAAGTCCAGTTCCATGGGCTCACGGACCAGGACCAGTGGGAGGAACAGGACAGGGACAAGCCCGTCACCCAGAACATCAGCGCTGAG…
4	TRBC2	573	207	1.2744	-0.159953	0.0499428	no	CTGTATTTTGGAGGGGGCACTCGGCTGTTGGTGCTAGATGATCTGAGCCGGGTCTACCCGCCCAAGGTGGCTGTGTTCGAACCCTCGGAGGCAGAGATCTCCCGGACCCAGAAGGCCACACTCGTGTGCCTGGCCACGGGCTTCTACCCCGACCATGTGGAGCTGACCTGGTGGGTGAACAGGAAGCAGGTCACGACTGGGGTCAGCACGGACCCTGAGCCCTATAAGGAGGACCCCACACGGGATGATTCCAGATACTGTCTGAGCAGCCGGCTGAGGGTGACCGCCGCCTTCTGGCACAACCCCCGCAACCACTTCCGATGCCAAGTCCAGTTCCATGGGCTCACGGACCAGGACCAGTGGGAGGAACAGGACAGGGACAAGCCCGTCACCCAGAAC…
5	MNCB-2990	501	429	0.761	0.0768813	0.356527	no	AGCAGCCGTGATAGTTGGAGTCTAAACCCTGTTGTGGCGGTCTCCGGGTGCCCTGTGAGAGAAAAGGGGAGGATGCCACTGGAATCATCTTCCTCTTCAATGCCGCTATCCTTCCCTTCTCCCTTACCCCCAGTACCAGACAATATTTCTAACTCTTCTCCTCCCCCAATGTCTTACATCACTTCCCAGGAGATGAAGTGTATTCTTCATTGGTTTGCCAGCTGGTCAGGTCCTCAGCGTGAACGTTTCCTTCAGGACCTGGTAGCTAAGGCAGTACCAGGAAAATTACAGCCATTGCTGGAAAGTCTGGAGCAGCTTAGTGTGTCTGGAGCAAACCGACCACCTTGTATCTTTGAGTGCCAGTTACGTCTTTGGGATCAGTGGTTTCGAGGTTGGGCT…
6	RFK	588	468	0.9381	0.222515	0.793128	yes	GGCCGGCCGAACTCCCTCACGTGTCTCCCGGCTGGTCCGGGGGGTCAGGGCACCGCCTCCACGGCGGCCCCGCCGGACTCGCGGTCGGGGCCGCAGCCCGAACCTGAAGCGGACGGCGTCATGAGGCAGCTGCCATACTTCTGCCGCGGCCAAGTGGTGCGGGGCTTCGGCCGCGGCTCCAAGCAGTTGGGCATCCCTACAGCTAACTTTCCTGAACAAGTAGTAGATAATCTTCCAGCTGATATATCTACTGGCATTTATTATGGTTGGGCCAGTGTTGGAAATGGAGATGTCCATAAGATGGTGGTGAGCATAGGATGGAACCCATACTACAAGAATACTAAAAAATCCATGGAAACTCATATCATGCATACTTTCAAAGAGGACTTCTATGGGGAA…
7	OXCT2	1515	1377	1.2791	0.500721	0.999999	yes	CGGGTCCCCGCCGGCCGCTCGGGGCGCGCGCTGGCGAAGGGTGGCGCCTGCGGCTTCGCCTGCAGCGCCCGCGCGCGCGCCAGGTTCTACACGGACCCGGTGAAGGCCGTGGGAGACATCACTGATGGCTCGAGGATCATGATCGGGGGCTTCGGGCTCTGCGGCATCCCGGAGAACCTGATAGGGGCGCTGCTGAAGACCCGCGTGAAGGACTTGACAGTGGTCAGCAGCAACGTGGGGGTGGAGAGCTTCGGTCTCGGCCTTTTACTGGGGACCAAGCAGATCACCCGCATCGTCTGCTCCTACCTGGGGGAGAACTCGCTCTGTGAGCACCAGTACCTGGCGGGTGAGCTGGAGCTGGAGATCACGCCCCAGGGCACCCTGGCCGAGCGCATCCGC…
8	H3	411	411	1.1128	0.379532	0.910842	yes	ATGGCACGCACAAAGCAGACAGCCAGGAAGTCCACTGGTGGCAAGGCCCCAAGGAAGCAGCTCGCTTCCAAGGCAGCCAGGAAGTCCGCGCCTCTCAGTGGCGGCATCAAGAAGCCCCACCGATACAGGCCCGGAACTGTTGCTCTCCGAGAGATCCGCAGATACCAGAAGAGCACTGACCTGCTGATCAGGAAGCTGCCCTTCCAGCGCCTGGTGCGTGAAATCGCACAGGACTTCAAGACTGACCTGCGTTTCCAGTCCTCTGCTGTCCTCGCCCTCCAGGAAGCTGCTGAAGCTTACCTTGTTGGCCTGTTTGAGGACACCAACTTGTGCGCTATCCACGCCAAGAGAGTTACTATCATGCCCAAGGACATTCAGCTTGCGAGAAGAATCCGTGGA…
9	DPYD	3081	2994	0.9959	0.1391	1	yes	CGGGCAAGCTGTCCCTTTCGTCTTTGGCTGAAGCCTGAGGACGCGGAAGGGTTCGTGGCAAGAAAACCCCAGGCTCTGGACATCGCCATGGCCCCTGTGCTAAGCAAGGATGTGGCGGATATCGAGAGTATCCTGGCTTTAAATCCTCGAACACAGTCTCATGCAACTCTGCGTTCCACTTCGGCCAAGAAATTAGACAAGAAACATTGGAAAAGAAATCCTGATAAGAACTGCTTTAATTGCGAGAAGCTGGAGAATAATTTTGATGACATCAAGCACACGACTCTTGGTGAGCGAGGAGCTCTCCGAGAAGCAATGAGATGCCTGAAATGTGCAGATGCCCCCTGTCAGAAGAGCTGTCCAACAAATCTAGATATCAAATCGTTCATCACAAGTATC…
10	MT-ND4L	324	192	1.0527	-0.12205	0.0282221	no	GATTATGATCAAACTCATAACTACCAAGTGTCGCTAGTATACATAAATATTATAATAGCATTCACAATCTCTCTTGTAGGATTGCTAATATATCGATCCCACCTAATATCCTCCCTTCTATGCCTAGAAGGAATGATACTGTCCCTATTCGTTATAGCTGCTCTAACAATTCTTAATTCACACTTCACGCTAGCCAGCATAATACCTATCATCTTACTGGTCTTCGCAGCCTGCGAAGCGGCACTAGGTCTATCTCTGCTAGTAATAGTATCCAACACATATGGTACTGACTATGTGCAAAATCTCAACCTACTTAAATGCTAA
11	KCTD1	663	657	1.012	0.282337	0.982188	yes	GGCCACATGTACACCAGCAGCCTGGCCACCCTCACCAAATACCCCGAGTCAAGAATCGGAAGACTTTTTGATGGTACAGAGCCCATTGTTTTGGACAGTCTCAAACAGCACTATTTCATTGACAGAGACGGACAGATGTTCAGATATATCTTGAATTTTCTACGAACATCAAAACTCCTCATTCCTGATGATTTCAAGGACTACACTTTGTTATATGAAGAGGCAAAATATTTTCAGCTTCAGCCCATGCTGTTGGAGATGGAAAGATGGAAGCAGGACAGAGAAAGTGGTCGCTTTTCAAGGCCCTGCGAGTGCCTCGTGGTACGTGTGGCCCCAGACCTCGGAGAGAGGATCACGCTCAGCGGAGACAAATCCTTGATAGAAGAAGTGTTCCCAGAG…
12	SAA1	351	282	1.0691	0.29761	0.563334	yes	TCCTTTGTGGTGGGGGTCCACCGCCAGGGGTGGGCCTTTTTTGGTGGGGCTTTTGAAGGGGCTAAAAACATGTGGGGGGCCTACTCTGACATGAGAGAAGCCAACTACAAGGGTGCAGACAAATACTTCCACGCCCGTGGAAACTATGACGCTGCCCAAAGGGGACCGGGGGGTGCCTGGGCTGCTAAAGTGATCAGTGATGCCAGAGAAAATATTCAGAGATTCACAGACCCTCTGTTTAAGGGTACGACCAGTGGCCAGGGTCGGGAGGACTCGAGGGCCGACCAGGAGGCCAACGAATGGGGCCGGAGCGGCAAAGACCCCAACCACTTCAGACCTGCTAGATCGGAA
13	SPACA5	513	471	0.8309	0.276571	0.802335	yes	CTGGAGCAGGGGAGTAAGTTAGGACGACTTGTGGCTGTCATAATGCAGGTCTCAGGCACTATTGTAGTGATCCTGATGGCTGCCAACGTGGAGGCCAAGATCTACGAACGCTGTGACCTGGCAAAGAAGCTGGAAGCGGCAGGCCTCAACGGCTTCAAGGGCTATACCATTGGAGACTGGCTGTGCATGGCACACTATGAGAGTGGCTTTGACACTTCCTTCATGAACCACAATCTCGATGGCAGCAGCGAATATGGCATTTTTCAGCTGAATTCCGCCTGGTGGTGTTACAACGGTGTTACACCCAGCGAGAACCTCTGCCACATGGATTGTCATGAACTGCTCAACCGCCATATTCTGGATGACATTATGTGTGCCAAGAAGGTAGTGTCCTCAGAG…
14	ODF3	765	765	1.1029	0.468967	0.998757	yes	ATGGCGGAAGAGGTATGGGTGGGCACCTGGAGGCCCCATCGTCCCCGGGGGCCCATCATGGCCCTCTACAGCAGCCCTGGACCCAAGTACCTGATTCCACCCACCACGGGCTTTGTGAAGCACACACCCACCAAGCTGCGTGCACCAGCCTACAGCTTCCGTGGGGCTCCCATGCTCCTGGCAGAGAACTGCTCTCCAGGGCCCCGCTACAGCGTGAACCCCAAGATACTGAGAACTGGCAAGGATCTTGGCCCCGCCTACTCCATCCTGGGGCGCTACCACACAAAGACCACACTGACCCCTGGCCCTGGCGACTACTTTCCAGAGAAATCTACCAAGCATGTGTTCGACTCGGCCCCCAGCCACTCTATTTCTGCCCGAACCAAGACCTTCCGAGTG…
15	BPIFB1	1488	1422	1.2944	0.45481	0.999999	yes	GAGCAGCAGGCCGAGGCATCCGCGTGTCCAGGTTCTGCCACGTGCCACCTGCCAACCCCGAAGAAGATGGCCTACCCGTGGACCTTCACCTTCCTCTGTGGTTTGCTGGCAGCCAACCTGGTAGGAGCCACCTTAAGCCCTCCTGTGGTCCTCAGTCTCAGCACAGAAGTCATCAAGCAAATGCTGGCTCAGAAACTGAAGAATCACAATGTTACCAACACCCTGCAGCAGCTGCCACTGCTCACTGCCATGGAGGAGGAGTCATCCAGGGGCATTTTCGGCAACCTGGTGAAATCCATCCTGAAGCATATTCTCTGGATGAAAGTCACCTCAGCCAGCATCGGTCAGCTGCAGGTGCAGCCCCTGGCCAACGGCCGGCAGCTGATGGTTAAGGCCCCC…
16	B2M	447	357	1.1739	0.359686	0.858013	yes	CCGGACCCGACTGCGCTCCGGAACCGGCTCTTGAGTGTCCCCAGGCCGCCTCGGTGTCCTCGACTCAACCTCCCCACCGCTGCTGCAAGCATGGCTCGCTTCGTGGCCTTGGTCCTTCTCGGGCTGCTGTCGCTGTCTGGACTGGACGCCATCCAGCGTCGTCCAAAGATTCAAGTGTACTCAAGACACCCACCAGAAGATGGAAAGCCAAATTACCTGAACTGCTATGTGTCTGGGTTCCATCCACCCCAGATTGAAATTGATTTGCTGAAGAATGGGGAGAAGATTAAATCGGAGCAGTCAGACCTGTCTTTCAGCAAGGACTGGTCTTTCTACCTGCTGTCCCACGCCGAGTTCACTCCCAACAGCAAGGATCAGTACAGCTGCCGAGTGAAACAC…
17	CYP2D14	1470	1470	1.2954	0.582251	1	yes	ATGGGGCTGCTGTCTGGGGACACGCTGGGGACCCTGGCTGTGGCCGTGCTCATCTTCTTGCTCTTGCTGGACCTGATGCACCGACGCTCACGTTGGGCCGCACGCTACCCACCAGGCCCCACGCCGCTGCCGGTGCTGGGCAACCTGCTGCAGGTGGACTTCGAGGACCCGCGTCCCAGCTTTAACCAGCTGCGGCGCCGCTTCGGGAACGTGTTCAGCCTGCAGCAGGTCTGGACGCCGGTAGTCGTGCTCAACGGGCTGGCGGCTGTGCGCGAGGCGCTGGTGTACCGCAGCCAGGACACTGCCGACCGTCCACCTCCGGCCGTCTACGAGCACCTGGGTTACGGGCCGCACGCCGAAGGTGTGATCCTGGCGCGATATGGGGACGCCTGGCGCGAG…
